# Supplementary material for: Effect of Yttrium Doping on Glass-Forming Ability, Thermal Stability, and Corrosion Resistance of Zr50.7Cu28Ni9Al12.3 Bulk Metallic Glass
Source: MDPI journal article supplement (doi:10.3390/met13030521), 2023-03-04
Supplement: s1 [file s1]

# Effect of Yttrium Doping on Glass Forming Ability, Thermal Stability and Corrosion Resistance of $\text{Zr}_{50.7}\text{Cu}_{28}\text{Ni}_9\text{Al}_{12.3}$ Bulk Metallic Glass

Yuzhao Zhou<sup>1</sup>, Ling Zhao<sup>1</sup>, Yuwei Qu<sup>1,2</sup>, Liwei Hu<sup>1,2</sup>, Li Qi<sup>2,\*</sup>, Fengsheng Qu<sup>1</sup>, Shixiong He<sup>1,\*</sup> and Xue Liu<sup>1,\*</sup>

<sup>1</sup> Institute of Materials, China Academy of Engineering Physics, Mianyang 621908, China; zhouyuzhao@yeah.net (Y.Z.); zhaoling\_010@126.com (L.Z.); yuwei05010831@163.com (Y.Q.); liwei\_hu@iphy.ac.cn (L.H.); qufengsheng@163.com (F.Q.)

<sup>2</sup> State Key Laboratory of Metastable Materials Science and Technology, Yanshan University, Qinhuangdao 066004, China

\* Correspondence: xueliuthu@126.com (X.L.); qili@ysu.edu.cn (L.Q.); heshx2012@163.com (S.H.)

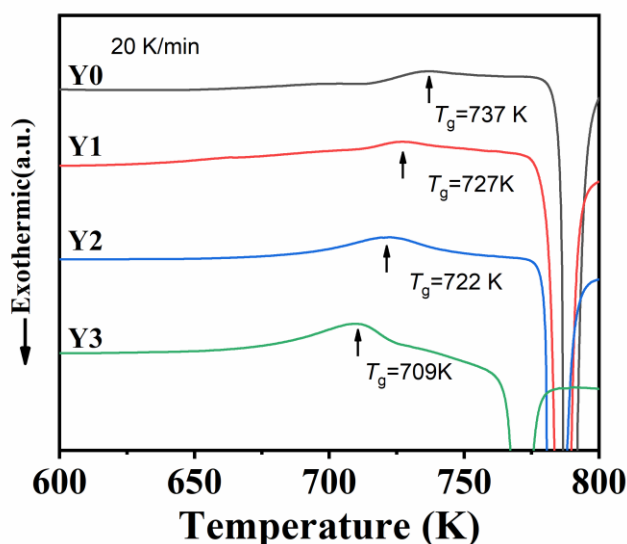

**Figure S1.** The enlarged DSC curves of the Y0, Y1, Y2 and Y3 alloys.

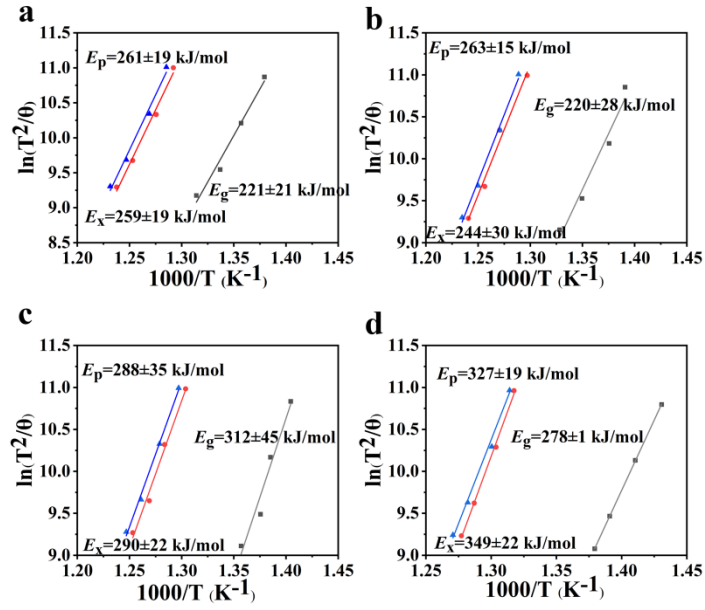

**Figure S2.** Kissinger plots of (a) Y0, (b) Y1, (c) Y2 and (d) Y3 alloys used to calculate the activation energies based on  $T_g$ ,  $T_x$  and  $T_p$ .

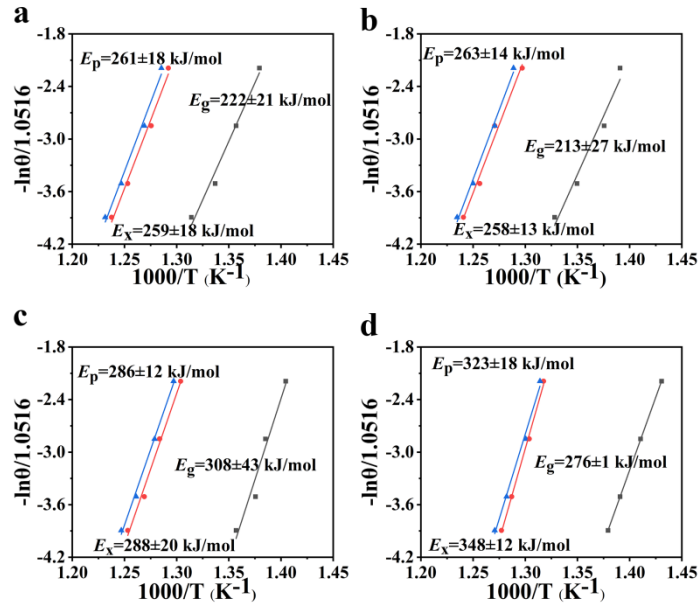

**Figure S3.** Ozawa plots of (a) Y0, (b) Y1, (c) Y2 and (d) Y3 alloys used to calculate the activation energies based on  $T_g$ ,  $T_x$  and  $T_p$ .
